# Supplementary material
Source: PubMed Central journal article supplement (PMC7065246)
Supplement: NIHMS1557742-supplement-3.pdf [file NIHMS1557742-supplement-3.pdf]

Table S1. Primers for *phqK* exon amplification and fusion

| <b>Name</b>         | <b>Sequence</b>                                             |
|---------------------|-------------------------------------------------------------|
| <i>phqK</i> _Int1_F | 5'-ATGGGCTCTTTAGGTGAAGAAGTTCAAG-3'                          |
| <i>phqK</i> _Int1_R | 5'-GTTGCTTTGAAGACCAATACAGTCTCCGATGGACTTCA GTATATTGCTTTTC-3' |
| <i>phqK</i> _Int2_F | 5'-GAAAAGCAATATACTGAAGTCCATCGGAGACTGTATTG GTCTTCAAAGCAAC-3' |
| <i>phqK</i> _Int2_R | 5'-CAGACGTCTAGGAGATTTCTTGTATCCTGATGAATGCAG AACCACGAAAAG-3'  |
| <i>phqK</i> _Int3_F | 5'-CTTTTCGTGGTTCTGCATTCATCAGGATACAAGAAATCT CCTAGACGTCTG-3'  |
| <i>phqK</i> _Int3_R | 5'-CTAGGGTGACTTGTTCTGCAATGG-3'                              |

Table S2. Crystallographic information. Values in parentheses pertain to the outermost shell of data.

| Ligand                                   | Malbrancheamide B SeMet ( <b>21</b> )                 | None                                                  | Malbrancheamide C ( <b>22</b> )                       | Paraherquamide K ( <b>14</b> )                        | Paraherquamide L ( <b>15</b> )                        |
|------------------------------------------|-------------------------------------------------------|-------------------------------------------------------|-------------------------------------------------------|-------------------------------------------------------|-------------------------------------------------------|
| Space Group                              | <i>P</i> 2 <sub>1</sub> 2 <sub>1</sub> 2 <sub>1</sub> |
| Cell Dimensions                          |                                                       |                                                       |                                                       |                                                       |                                                       |
| a,b,c (Å)                                | 48.0, 82.4, 119.3                                     | 47.7, 84.2, 116.4                                     | 48.1, 82.8, 120.1                                     | 48.2, 83.2, 119.6                                     | 64.9, 79.9, 87.7                                      |
|                                          | 90.0, 90.0, 90.0                                      | 90.0, 90.0, 90.0                                      | 90.0, 90.0, 90.0                                      | 90.0, 90.0, 90.0                                      | 90.0, 90.0, 90.0                                      |
| X-ray Source                             | APS 23ID-B                                            |
| Wavelength (Å)                           | 0.979                                                 | 1.033                                                 | 0.7293                                                | 1.033                                                 | 1.033                                                 |
| $d_{\min}$ (Å)                           | 1.69 (1.75 - 1.69)                                    | 1.71 (1.77 - 1.71)                                    | 1.25 (1.30 - 1.25)                                    | 1.89 (1.96 - 1.89)                                    | 2.09 (2.17 - 2.09)                                    |
| R-merge                                  | 0.082 (0.948)                                         | 0.071 (1.195)                                         | 0.069 (1.548)                                         | 0.193 (1.463)                                         | 0.155 (1.160)                                         |
| Avg I/ $\sigma$                          | 21.58 (1.55)                                          | 19.97 (1.34)                                          | 17.88 (1.11)                                          | 10.93 (1.14)                                          | 12.08 (1.66)                                          |
| Completeness (%)                         | 99 (88)                                               | 99 (91)                                               | 100 (99)                                              | 99 (95)                                               | 100 (98)                                              |
| Multiplicity                             | 12.0 (8.0)                                            | 12.4 (9.1)                                            | 13.0 (10.7)                                           | 12.7 (11.8)                                           | 12.6 (11.9)                                           |
| Total Reflections                        | 635,907                                               | 630,819                                               | 1,725,902                                             | 495,499                                               | 345,452                                               |
| CC <sub>1/2</sub>                        | 1.00 (0.72)                                           | 1.00 (0.60)                                           | 1.00 (0.53)                                           | 1.00 (0.56)                                           | 1.00 (0.54)                                           |
| CC*                                      | 1 (0.91)                                              | 1 (0.87)                                              | 1 (0.83)                                              | 1 (0.85)                                              | 1 (0.84)                                              |
| Refinement                               |                                                       |                                                       |                                                       |                                                       |                                                       |
| Reflections (#)                          | 53,023 (4,655)                                        | 50,852 (4,603)                                        | 132,940 (13,092)                                      | 39,106 (3,831)                                        | 27,473 (2,646)                                        |
| R <sub>work</sub> /R <sub>free</sub> (%) | 17.0/20.7                                             | 16.2/19.2                                             | 15.4/17.5                                             | 21.5/25.6                                             | 20.8/25.6                                             |
| Number of Non-Hydrogen Atoms             | 4,061                                                 | 3,991                                                 | 4,265                                                 | 3,823                                                 | 3,696                                                 |
| Macromolecules                           | 3,506                                                 | 3,538                                                 | 3,570                                                 | 3,517                                                 | 3,454                                                 |
| Ligands                                  | 79                                                    | 53                                                    | 79                                                    | 85                                                    | 86                                                    |
| Solvent                                  | 476                                                   | 400                                                   | 616                                                   | 221                                                   | 156                                                   |
| Amino Acid Residues                      | 444                                                   | 445                                                   | 444                                                   | 444                                                   | 438                                                   |
| Deviation From Ideality                  |                                                       |                                                       |                                                       |                                                       |                                                       |
| Bond Lengths (Å)                         | 0.006                                                 | 0.006                                                 | 0.005                                                 | 0.007                                                 | 0.008                                                 |
| Bond Angles (deg)                        | 0.9                                                   | 0.86                                                  | 0.85                                                  | 0.94                                                  | 1.01                                                  |
| Average B-Factor (Å <sup>2</sup> )       | 30.7                                                  | 37.4                                                  | 26.0                                                  | 39.9                                                  | 57.2                                                  |
| Macromolecules                           | 29.6                                                  | 36.6                                                  | 23.6                                                  | 39.8                                                  | 57.3                                                  |
| FAD                                      | 21.2                                                  | 25.6                                                  | 19.3                                                  | 30.1                                                  | 38.3                                                  |
| Substrate                                | 30.8                                                  |                                                       | 20.8                                                  | 57.3                                                  | 88.8                                                  |
| Solvent                                  | 40.2                                                  | 46.3                                                  | 40.5                                                  | 41.0                                                  | 53.9                                                  |
| Ramachandran Plot                        |                                                       |                                                       |                                                       |                                                       |                                                       |
| Favored (%)                              | 97.96                                                 | 97.52                                                 | 98.19                                                 | 97.06                                                 | 96.54                                                 |
| Allowed (%)                              | 2.04                                                  | 2.48                                                  | 1.81                                                  | 2.94                                                  | 3.46                                                  |
| Outliers (%)                             | 0                                                     | 0                                                     | 0                                                     | 0                                                     | 0                                                     |

Table S3. <sup>13</sup>C-NMR, <sup>1</sup>H-NMR, gHMBCAD, and gCOSY, correlations for paraherquamide K (**14**) isolated from *phqK* knockout in *P. simplicissimum*. HRMS (ESI-QTOF): m/z [M+H]<sup>+</sup> calculated for C<sub>27</sub>H<sub>33</sub>N<sub>3</sub>O<sub>2</sub> = 432.2651, experimental (isolated) = 432.2662.

Paraherquamide K (CD<sub>3</sub>)<sub>2</sub>SO-d<sub>6</sub>, 800 MHz

|    | $\delta$ <sup>13</sup> C | $\delta$ <sup>1</sup> H (J [Hz]) | gHMBCAD          | gCOSY |
|----|--------------------------|----------------------------------|------------------|-------|
| 1  | NH                       | 10.53 (s)                        | 2, 3, 8, 9       |       |
| 2  | 140.09                   |                                  |                  |       |
| 3  | 103.76                   |                                  |                  |       |
| 4  | 117.32                   | 7.01 (8.3)                       | 3, 6, 8          | 5     |
| 5  | 108.52                   | 6.44 (8.3)                       | 6, 7, 9          | 4     |
| 6  | 147.43                   |                                  |                  |       |
| 7  | 104.78                   |                                  |                  |       |
| 8  | 132.82                   |                                  |                  |       |
| 9  | 121.51                   |                                  |                  |       |
| 10 | 28.95                    | 2.65 (d, 15.5)                   | 2, 3, 11, 12, 20 |       |
|    |                          | 2.71 (d, 15.5)                   | 2, 3, 11, 12     |       |
| 11 | 55.62                    |                                  |                  |       |
| 12 | 59.53                    | 2.05 (d, 10.2)                   | 11, 16, 20       |       |
|    |                          | 3.27 (m)                         |                  |       |
| 13 | 64.36                    |                                  |                  |       |
| 14 | 39.84                    | 1.85 (dd, 16.6, 9.1)             |                  | 17    |
| 15 | 30.18                    | 1.70 (ddd, 21.8, 11.1, 5.4)      |                  | 16    |
|    |                          | 1.91 (m)                         |                  |       |
| 16 | 53.93                    | 2.14 (m)                         |                  | 15    |
|    |                          | 3.08 (m)                         |                  |       |
| 17 | 13.13                    | 1.32 (d, 7.0)                    | 13, 14           |       |
| 18 | 172.70                   |                                  |                  |       |
| 19 | 29.34                    | 1.58 (dd, 12.8, 4.0)             | 13, 18, 21       |       |
|    |                          | 2.02 (dd, 12.5)                  |                  |       |
| 20 | 46.16                    | 1.97 (m)                         |                  |       |
| 21 | 33.87                    |                                  |                  |       |
| 22 | 30.02                    | 1.28 (s)                         | 2, 20, 21, 23    |       |
| 23 | 23.38                    | 1.31 (s)                         | 2, 20, 21, 22    |       |
| 24 | 118.13                   | 6.94 (d, 9.8)                    | 6, 26            | 25    |
| 25 | 128.91                   | 5.72 (d, 9.7)                    | 7, 26            | 24    |
| 26 | 74.98                    |                                  |                  |       |
| 27 | 27.08                    | 1.36                             | 25, 26, 28       |       |
| 28 | 27.08                    | 1.36                             | 25, 26, 27       |       |
| 29 | NH                       | 8.11                             | 10, 11, 13       |       |

Table S4.  $^{13}\text{C}$ -NMR,  $^1\text{H}$ -NMR, gHMBCAD, and gCOSY, correlations for paraherquamide L (**15**) isolated from *phqK* knockout in *P. simplicissimum*. HRMS (ESI-QTOF):  $m/z$   $[\text{M}+\text{H}]^+$  calculated for  $\text{C}_{27}\text{H}_{33}\text{N}_3\text{O}_3 = 448.2600$ , experimental (isolated) = 448.2612.

Paraherquamide L ( $\text{CD}_3$ ) $_2\text{SO-d}_6$ , 600 MHz

|    | $\delta^{13}\text{C}$ | $\delta^1\text{H}$ ( $J$ [Hz]) | gHMBCAD         | gCOSY  |
|----|-----------------------|--------------------------------|-----------------|--------|
| 1  | NH                    | 10.89 (s)                      | 2, 3, 9, 10     |        |
| 2  | 141.57                |                                |                 |        |
| 3  | 104.01                |                                |                 |        |
| 4  | 112.32                | 6.92 (d, 8.3)                  | 6, 8            | 5      |
| 5  | 115.81                | 6.64 (d, 8.3)                  | 6, 7, 9         | 4      |
| 6  | 139.58                |                                |                 |        |
| 7  | 136.82                |                                |                 |        |
| 8  | 127.96                |                                |                 |        |
| 9  | 124.69                |                                |                 |        |
| 10 | 29.03                 | 2.71 (m)                       | 2, 3, 9, 11, 20 |        |
| 11 | 55.6                  |                                |                 |        |
| 12 | 59.54                 | 2.05 (m)                       |                 |        |
|    |                       | 3.28 (d, 9.9)                  |                 |        |
| 13 | 64.38                 |                                |                 |        |
| 14 | 39.91                 | 1.85 (m)                       | 18              | 15     |
| 15 | 30.19                 | 1.68 (ddt, 15.5, 10.5, 5.0)    | 14, 16, 17      | 14, 16 |
|    |                       | 1.90 (m)                       |                 |        |
| 16 | 53.43                 | 2.14 (td, 10.2, 4.7)           |                 | 15     |
|    |                       | 3.08 (q, 8.8)                  |                 |        |
| 17 | 13.17                 | 1.31 (s)                       | 14              |        |
| 18 | 172.72                |                                |                 |        |
| 19 | 29.44                 | 1.58 (dd, 12.4, 3.5)           | 13, 18, 20, 21  |        |
|    |                       | 2.02 (m)                       |                 |        |
| 20 | 46.2                  | 1.98 (m)                       |                 |        |
| 21 | 34.07                 |                                |                 |        |
| 22 | 29.83                 | 1.29 (s)                       | 23              |        |
| 23 | 23.22                 | 1.30 (s)                       | 2, 21, 22       |        |
| 24 | 139.25                | 6.51 (d, 7.6)                  | 7, 25, 26       |        |
| 25 | 115.35                | 4.97 (d, 7.6)                  | 24, 26          |        |
| 26 | 78.86                 |                                |                 |        |
| 27 | 29.5                  | 1.35 (s)                       | 25, 26          |        |
| 28 | 29.5                  | 1.35 (s)                       | 25, 26          |        |
| 29 | NH                    | 8.13 (s)                       | 10, 11          |        |

Table S5. <sup>13</sup>C-NMR, <sup>1</sup>H-NMR, gHMBCAD, gCOSY, and NOESY correlations for paraherquamide M (**16**) isolated from PhqK *in vitro* reactions. HRMS (ESI-QTOF): m/z [M+H]<sup>+</sup> calculated for C<sub>27</sub>H<sub>33</sub>N<sub>3</sub>O<sub>3</sub> = 448.2600, experimental (isolated) = 448.2604.

Paraherquamide M (CD<sub>3</sub>)<sub>2</sub>SO-d<sub>6</sub>, 800 MHz

| Position | $\delta^{13}\text{C}$ | $\delta^1\text{H}$ (J [Hz]) | gHMBCAD         | gCOSY | NOESY |
|----------|-----------------------|-----------------------------|-----------------|-------|-------|
| 1        | NH                    | 10.61 (s)                   | 8               |       | 24    |
| 2        | 183.17                |                             |                 |       |       |
| 3        | 172.02                |                             |                 |       |       |
| 4        | 125.91                | 7.03 (d, 8.1)               | 6, 7, 8, 10     | 5     | 5, 10 |
| 5        | 108.02                | 6.32 (d, 8.1)               | 6, 7            | 4     | 4     |
| 6        | 152.00                |                             |                 |       |       |
| 7        | 104.31                |                             |                 |       |       |
| 8        | 138.35                |                             |                 |       |       |
| 9        | 122.13                |                             | 5               |       |       |
| 10       | 38.41                 | 1.78 (d, 14.8)              | 2, 12, 16       |       |       |
|          |                       | 2.27 (d, 14.8)              | 2, 21           |       | 29    |
| 11       | 61.37                 |                             |                 |       |       |
| 12       | 60.15                 | 2.31 (d, 10.5)              | 16, 18          |       |       |
|          |                       | 3.58 (d, 10.7)              | 13, 20          |       |       |
| 13       | 66.96                 |                             |                 |       |       |
| 14       | 39.34                 | 1.81 (m)                    | 13              |       | 17    |
| 15       | 30.05                 | 1.64 (m)                    |                 | 16    |       |
|          |                       | 1.90 (m)                    |                 |       |       |
| 16       | 52.43                 | 2.13 (m)                    |                 | 15    |       |
|          |                       | 3.05 (m)                    | 13              |       |       |
| 17       | 13.06                 | 1.30 (d, 7.0)               | 13, 16          |       |       |
| 18       | 60.74                 |                             |                 |       |       |
| 19       | 27.06                 | 1.27 (m)                    | 20              | 20    | 20    |
|          |                       | 1.88 (m)                    | 3, 17           |       | 20    |
| 20       | 52.53                 | 2.84 (t, 10.4)              | 19, 22, 23      | 19    | 19    |
| 21       | 45.21                 |                             |                 |       |       |
| 22       | 23.99                 | 0.72 (s)                    | 11, 20, 21, 23  |       |       |
| 23       | 20.24                 | 0.94 (s)                    | 20, 21, 22      |       |       |
| 24       | 116.68                | 6.57 (d, 9.9)               | 6, 7, 8, 25, 26 | 25    |       |
| 25       | 130.1                 | 5.73 (d, 9.9)               | 7, 27           | 24    |       |
| 26       | 75.73                 |                             |                 |       |       |
| 27       | 27.52                 | 1.36 (d, 18.5)              | 25, 26, 28      |       |       |
| 28       | 27.52                 | 1.36 (d, 18.5)              | 25, 26, 27      |       |       |
| 29       | NH                    | 8.47 (s)                    |                 |       |       |

Table S6.  $^{13}\text{C}$ -NMR,  $^1\text{H}$ -NMR, gHMBCAD, gCOSY, and NOESY correlations for paraherquamide N (**17**) isolated from PhqK *in vitro* reactions. HRMS (ESI-QTOF):  $m/z$   $[\text{M}+\text{H}]^+$  calculated for  $\text{C}_{27}\text{H}_{33}\text{N}_3\text{O}_4 = 464.2549$ , experimental (isolated) = 464.2550.

Paraherquamide N ( $\text{CD}_3$ ) $_2\text{SO-d}_6$ , 600 MHz

| Position | $\delta^{13}\text{C}$ | $\delta^1\text{H}$ (J [Hz]) | gHMBCAD        | gCOSY | NOESY  |
|----------|-----------------------|-----------------------------|----------------|-------|--------|
| 1        | NH                    | 10.51 (s)                   | 3, 6, 8        |       |        |
| 2        | 182.45                |                             |                |       |        |
| 3        | 62.03                 |                             |                |       |        |
| 4        | 120.96                | 6.99 (d, 8.1)               | 3, 8, 9        | 5     | 10, 23 |
| 5        | 116.17                | 6.60 (d, 8.0)               | 6, 7, 9        | 4     |        |
| 6        | 126.22                |                             |                |       |        |
| 7        | 135.04                |                             |                |       |        |
| 8        | 133.41                |                             |                |       |        |
| 9        | 145.61                |                             |                |       |        |
| 10       | 38.33                 | 1.82 (s)                    | 2, 21, 16      |       |        |
|          |                       | 2.28 (s)                    | 2, 21          |       | 29     |
| 11       | 60.87                 |                             |                |       |        |
| 12       | 60.14                 | 2.31 (d, 10.7)              | 13, 16         |       |        |
|          |                       | 3.61 (d, 10.8)              | 13, 16         |       |        |
| 13       | 66.93                 |                             |                |       |        |
| 14       | 39.46                 | 1.80 (m)                    | 13, 15, 16, 19 |       |        |
| 15       | 30.06                 | 1.64 (m)                    | 14, 16, 17     | 16    |        |
|          |                       | 1.91 (m)                    | 13             |       |        |
| 16       | 52.45                 | 2.14 (m)                    | 12             | 15    |        |
|          |                       | 3.05 (m)                    | 13, 14, 15     |       |        |
| 17       | 13.03                 | 1.30 (d, 7.0)               | 13, 14, 15     |       |        |
| 18       | 172.00                |                             |                |       |        |
| 19       | 27.05                 | 1.27 (m)                    | 11, 18, 20, 21 | 20    |        |
|          |                       | 1.89 (m)                    | 13, 18         |       |        |
| 20       | 52.45                 | 2.81 (t, 20.5, 10.3)        | 19, 21, 22, 23 | 19    | 19, 19 |
| 21       | 45.21                 |                             |                |       |        |
| 22       | 24.11                 | 0.72 (s)                    | 3, 20, 21, 23  |       |        |
| 23       | 20.40                 | 0.95 (s)                    | 3, 20, 21, 23  |       |        |
| 24       | 139.00                | 6.36 (d, 7.6)               | 7, 25, 26      | 25    | 25     |
| 25       | 115.17                | 4.97 (d, 7.6)               | 24, 26, 27, 28 | 24    | 24     |
| 26       | 79.28                 |                             |                |       |        |
| 27       | 29.22                 | 1.36 (d, 16.7)              | 24, 25, 26, 28 |       |        |
| 28       | 29.22                 | 1.36 (d, 16.7)              | 24, 25, 26, 27 |       |        |
| 29       | NH                    | 8.50 (s)                    | 10, 13, 11     |       | 10     |

Table S7. <sup>1</sup>H-NMR for malbrancheamide (**19**) isolated from *Malbranchea aurantiaca*. HRMS (ESI-QTOF): m/z [M+H]<sup>+</sup> calculated for C<sub>21</sub>H<sub>23</sub>Cl<sub>2</sub>N<sub>3</sub>O = 404.1291, experimental (isolated) = 404.1287.

Malbrancheamide CD<sub>3</sub>OD, 600 MHz

| Position | $\delta$ <sup>1</sup> H (J [Hz]) |
|----------|----------------------------------|
| 1        | 2.56 (m)                         |
|          | 1.49 (m)                         |
| 2        | 1.87 (m)                         |
| 3        | 2.03 (m)                         |
|          | 2.19 (m)                         |
| 5        | 2.27 (dd, 10.3, 1.5)             |
|          | 3.43 (d, 10.2)                   |
| 6        | 2.84                             |
| 7        | 7.48 (s)                         |
| 10       | 7.40 (s)                         |
| 12a      | 2.13 (m)                         |
| 13       | 2.03 (d, 13.1)                   |
|          | 1.96 (dd, 13.1, 5.2)             |
| 16       | 1.32 (s)                         |
| 17       | 1.42 (s)                         |

Table S8. <sup>1</sup>H-NMR, gHMBCAD, gCOSY, and NOESY correlations for spiromalbramide (**20**) isolated from PhqK *in vitro* reactions. HRMS (ESI-QTOF): m/z [M+H]<sup>+</sup> calculated for C<sub>27</sub>H<sub>33</sub>N<sub>3</sub>O<sub>4</sub> = 420.1246, experimental (isolated) = 420.1243.

Spiromalbramide CD<sub>3</sub>OD, 600MHz

| Position | δ <sup>13</sup> C | δ <sup>1</sup> H (J [Hz])  | gHMBCAD                 | gCOSY | NOESY |
|----------|-------------------|----------------------------|-------------------------|-------|-------|
| 1        | 28.19             | 2.46 (ddd, 12.8, 9.5, 3.9) | 14                      | 2     | 2     |
|          | 28.21             | 1.46 (td, 11.7, 7.1)       | 13a                     | 2     |       |
| 2        | 22.99             | 1.89 (m)                   |                         | 1, 3  | 1, 3  |
| 3        | 54.08             | 3.11 (td, 8.9, 3.0)        |                         | 2     | 2     |
|          |                   | 2.25 (q, 8.9)              |                         | 2     |       |
| 5        | 59.77             | 3.71 (d, 11.3)             | 3, 5a, 13a              |       | 17    |
|          | 59.73             | 2.65 (d, 10.0)             |                         |       |       |
| 5a       | 68.62             |                            |                         |       |       |
| 6        | 39.31             | 2.39 (d, 15.1)             | 5, 6a, 6b, 11a, 12, 12a |       |       |
|          | 39.24             | 2.06 (d, 15.2)             |                         |       |       |
| 6a       | 63.75             |                            |                         |       |       |
| 6b       | 131.82            |                            |                         |       |       |
| 7        | 128.72            | 7.51 (s)                   | 6a, 8, 9, 10a           |       | 6, 17 |
| 8        | 125.49            |                            |                         |       |       |
| 9        | 132.24            |                            |                         |       |       |
| 10       | 112.12            | 7.02 (s)                   | 8, 9, 10a               |       |       |
| 10a      | 143.75            |                            |                         |       |       |
| 11a      | 184.11            |                            |                         |       |       |
| 12       | 46.97             |                            |                         |       |       |
| 12a      | 55.10             | 3.05 (t, 10.1)             |                         | 13    | 16    |
| 13       | 28.81             | 1.86 (m)                   | 5a, 14                  | 12a   | 12a   |
|          | 28.78             | 1.71 (dd, 12.7, 10.0)      |                         |       | 17    |
| 13a      | 62.60             |                            |                         |       |       |
| 14       | 175.61            |                            |                         |       |       |
| 16       | 24.40             | 0.83 (s)                   | 6a, 12, 12a, 17         |       |       |
| 17       | 20.93             | 1.12 (s)                   | 6a, 12, 12a, 16         |       | 5, 13 |



Table S9. <sup>1</sup>H-NMR for malbrancheamide B (**21**) isolated from *Malbranchea aurantiaca*. HRMS (ESI-QTOF): m/z [M+H]<sup>+</sup> calculated for C<sub>21</sub>H<sub>23</sub>ClN<sub>3</sub>O = 370.1681, experimental (isolated) = 370.1675.

Malbrancheamide B, (CD<sub>3</sub>)<sub>2</sub>SO-d<sub>6</sub>, 600 MHz

| Position | $\delta$ <sup>1</sup> H (J [Hz]) |
|----------|----------------------------------|
| 1        | 2.47 (m)                         |
|          | 1.34 (m)                         |
| 2        | 1.75 (m)                         |
| 3        | 2.97 (m)                         |
|          | 2.43 (m)                         |
| 5        | 2.16 (d, 9.6)                    |
|          | 3.29 (d, 9.9)                    |
| 6        | 2.77 (s)                         |
| 7        | 7.33 (d, 8.4)                    |
| 8        | 6.96 (dd, 8.4, 1.9)              |
| 10       | 7.28 (s)                         |
| 12a      | 1.89 (d, 13.0)                   |
| 13       | 1.83 (dd, 13.0, 4.8)             |
|          | 1.91 (m)                         |
| 16       | 1.27 (s)                         |
| 17       | 1.33 (s)                         |

Table S10. <sup>1</sup>H-NMR, gHMBCAD, gCOSY, and NOESY correlations for spiromalbrancheamide B (**25**) isolated from PhqK *in vitro* reactions. HRMS (ESI-TOF): m/z [M+H]<sup>+</sup> calculated for C<sub>21</sub>H<sub>24</sub>ClN<sub>3</sub>O<sub>2</sub> = 386.1635, experimental (isolated) = 386.1630.

Spiromalbrancheamide B CD<sub>3</sub>OD, 600MHz

| Position | $\delta^{13}\text{C}$ | $\delta^1\text{H}$ ( <i>J</i> [Hz]) | gHMBCAD           | gCOSY | NOESY    |
|----------|-----------------------|-------------------------------------|-------------------|-------|----------|
| 1        | 28.38                 | 1.45 (m)                            | 14                |       |          |
|          |                       | 2.46 (ddd, 13.0, 9.4, 4.0)          | 14                | 14    |          |
| 2        | 23.09                 | 1.89 (s)                            |                   | 3     | 1, 3     |
| 3        | 54.44                 | 2.25 (q, 8.9)                       |                   | 2     | 5        |
|          |                       | 3.11 (td, 8.6, 2.7)                 |                   |       | 2        |
| 5        | 59.96                 | 2.65 (dd, 11.3, 1.8)                | 12a, 13a          |       |          |
|          |                       | 3.71 (d, 11.2)                      | 3, 5a             |       | 6, 17    |
| 5a       | 68.89                 |                                     |                   |       |          |
| 6        | 39.59                 | 2.03 (d, 15.1)                      | 6b, 11a, 12a, 13a |       | 5        |
|          |                       | 2.39 (d, 15.1)                      | 11a, 12, 13a      |       |          |
| 6a       | 63.61                 |                                     |                   |       |          |
| 6b       | 130.18                |                                     |                   |       |          |
| 7        | 128.25                | 7.31                                | 6a, 9, 10a        | 8     | 17       |
| 8        | 122.49                | 7.01 (dd, 8.1, 2.0)                 | 6b, 9             | 7     |          |
| 9        | 135.1                 |                                     |                   |       |          |
| 10       | 110.86                | 6.89 (s)                            | 6b, 9             |       |          |
| 10a      | 144.94                |                                     |                   |       |          |
| 11a      | 184.82                |                                     |                   |       |          |
| 12       | 46.88                 |                                     |                   |       |          |
| 12a      | 55.17                 | 3.05 (m)                            | 12, 13a, 16       | 13    | 13, 16   |
| 13       | 28.91                 | 1.71 (dd, 12.8, 9.9)                | 14                | 12a   | 17       |
|          |                       | 1.86 (m)                            | 13a               | 12a   |          |
| 13a      | 62.99                 |                                     |                   |       |          |
| 14       | 175.86                |                                     |                   |       |          |
| 16       | 24.59                 | 0.83 (s)                            | 6a, 12, 12a, 17   | 17    | 12a      |
| 17       | 21.22                 | 1.11 (s)                            | 6a, 12, 12a, 16   | 16    | 5, 6, 13 |

Table S11. <sup>1</sup>H-NMR for malbrancheamide C (**22**) isolated from MalA bromination *in vitro* reaction. HRMS (ESI-QTOF): m/z [M+H]<sup>+</sup> calculated for C<sub>21</sub>H<sub>24</sub>BrN<sub>3</sub>O = 414.1181, experimental (*in vitro*) 414.1169.

Malbrancheamide C CD<sub>3</sub>OD, 700 MHz

| Position | $\delta$ <sup>1</sup> H (J [Hz]) |
|----------|----------------------------------|
| 1        | 2.53 (ddd, 12.0, 9.0, 5.5)       |
|          | 1.47 (m)                         |
| 2        | 1.89 (m)                         |
| 3        | 3.06 (m)                         |
|          | 2.18 (m)                         |
| 5        | 2.26 (dd, 11.9, 1.6)             |
|          | 3.45 (d, 9.8)                    |
| 6        | 2.87 (d, 9.7)                    |
| 7        | 7.26 (d, 10.4)                   |
| 8        | 7.07 (dd, 11.4, 1.8)             |
| 10       | 7.42 (d, 1.8)                    |
| 12a      | 2.16 (m)                         |
| 13       | 2.01 (dd, 13.1, 11.1)            |
|          | 1.96 (dd, 13.3, 5.0)             |
| 16       | 1.34 (s)                         |
| 17       | 1.43 (s)                         |

Table S12. <sup>1</sup>H-NMR, gHMBCAD, gCOSY, and NOESY correlations for spiromalbrancheamide C (**26**) isolated from PhqK *in vitro* reactions. HRMS (ESI-QTOF): m/z [M+H]<sup>+</sup> calculated for C<sub>21</sub>H<sub>24</sub>BrClN<sub>3</sub>O<sub>2</sub> = 430.1130, experimental (isolated) = 430.1138.

Spiromalbrancheamide C CD<sub>3</sub>OD, 800MHz

| Position | $\delta^{13}\text{C}$ | $\delta^1\text{H}$ (J [Hz]) | gHMBCAD             | gCOSY | NOESY  |
|----------|-----------------------|-----------------------------|---------------------|-------|--------|
| 1        | 28.38                 | 1.47 (m)                    | 13a, 14             | 2     |        |
|          |                       | 2.46 (ddd, 13.3, 9.6, 4.0)  |                     | 13    | 2      |
| 2        | 23.05                 | 1.89 (m)                    |                     |       | 1, 3   |
| 3        | 54.44                 | 2.25 (q, 9.1)               | 5                   | 13    | 2      |
|          |                       | 3.11 (td, 8.7, 2.8)         | 13a                 | 2     |        |
| 5        | 59.97                 | 2.65 (d, 10.8)              | 3, 5a               |       |        |
|          |                       | 3.71 (d, 11.2)              | 13a, 14             |       | 17     |
| 5a       | 63.01                 |                             |                     |       |        |
| 6        | 39.56                 | 2.03 (d, 15.1)              | 5, 5a, 6b, 11a, 12a |       |        |
|          |                       | 2.39 (d, 15.1)              | 5, 5a, 11a          |       |        |
| 6a       | 63.68                 |                             |                     |       |        |
| 6b       | 130.70                |                             |                     |       |        |
| 7        | 128.59                | 7.26 (d)                    | 6a, 10, 10a         |       | 6, 17  |
| 8        | 125.48                | 7.17 (d)                    | 6b, 9               |       |        |
| 9        | 113.72                | 7.04 (s)                    | 6b, 8, 10           |       |        |
| 10       | 122.71                |                             |                     |       |        |
| 10a      | 145.11                |                             |                     |       |        |
| 11a      | 184.69                |                             |                     |       |        |
| 12       | 46.86                 |                             |                     |       |        |
| 12a      | 55.19                 | 3.05 (t, 10.4)              | 5, 6a, 12, 13       | 13    | 13, 16 |
| 13       | 28.92                 | 1.71 (dd, 12.8, 9.8)        | 13a, 14             | 12a   | 17     |
|          |                       | 1.87 (m)                    | 5a, 12a             | 12a   |        |
| 13a      | 68.89                 |                             |                     |       |        |
| 14       | 175.88                |                             |                     |       |        |
| 16       | 24.60                 | 0.83 (s)                    | 6a, 12, 12a, 17     |       |        |
| 17       | 21.22                 | 1.10 (s)                    | 6a, 12, 12a, 16     |       | 7, 13  |

Table S13. <sup>1</sup>H-NMR for isomalbrancheamide D (**24**) isolated from MalA bromination and chlorination *in vitro* reactions. HRMS (ESI-QTOF): m/z [M+H]<sup>+</sup> calculated for C<sub>21</sub>H<sub>23</sub>BrClN<sub>3</sub>O = 448.0786, experimental (*in vitro*) 448.0783.

Isomalbrancheamide D CD<sub>3</sub>OD, 700 MHz

| Position | $\delta$ <sup>1</sup> H (J [Hz]) |
|----------|----------------------------------|
| 1        | 2.53 (ddd, 12.2, 9.1, 5.6)       |
|          | 1.46 (m)                         |
| 2        | 1.88 (m)                         |
| 3        | 3.06 (m)                         |
|          | 2.16 (q, 8.8)                    |
| 5        | 2.26 (d, 10.4)                   |
|          | 3.43 (d, 10.3)                   |
| 6        | 2.84 (d, 4.8)                    |
| 7        | 7.51 (s)                         |
| 10       | 7.57 (s)                         |
| 12a      | 2.15 (m)                         |
| 13       | 2.01 (m)                         |
|          | 1.94 (m)                         |
| 16       | 1.33 (s)                         |
| 17       | 1.43 (s)                         |

Table S14. <sup>1</sup>H-NMR, gHMBCAD, gCOSY, and NOESY correlations for spiroisomalbrancheamide D (**28**) isolated from PhqK *in vitro* reactions. HRMS (ESI-QTOF): m/z [M+H]<sup>+</sup> calculated for C<sub>21</sub>H<sub>24</sub>BrClN<sub>3</sub>O<sub>2</sub> = 464.0740, experimental (isolated) = 464.0715.

Spiroisomalbrancheamide D CD<sub>3</sub>OD, 800MHz (600 MHz for <sup>1</sup>H-NMR)

| Position | $\delta$ <sup>13</sup> C | $\delta$ <sup>1</sup> H (J [Hz]) | gHMBCAD         | gCOSY | NOESY |
|----------|--------------------------|----------------------------------|-----------------|-------|-------|
| 1        | 28.37                    | 1.45 (m)                         |                 | 2     | 13    |
|          |                          | 2.46 (ddd, 12.8, 9.4, 3.9)       |                 |       |       |
| 2        | 23.04                    | 1.89 (s)                         |                 | 1, 3  |       |
| 3        | 54.40                    | 2.25 (m)                         | 13a             |       |       |
|          |                          | 3.11 (td, 8.6, 2.7)              |                 | 2     |       |
| 5        | 59.88                    | 2.65 (d, 11.8)                   |                 |       |       |
|          |                          | 3.71 (d, 11.4)                   | 13a             |       |       |
| 5a       | 62.95                    |                                  |                 |       |       |
| 6        | 39.34                    | 2.06 (d, 15.2)                   | 6b, 11a         |       |       |
|          |                          | 2.39 (d, 15.2)                   | 5               |       |       |
| 6a       | 64.010                   |                                  |                 |       |       |
| 6b       | 132.400                  |                                  |                 |       |       |
| 7        | 128.73                   | 7.53 (s)                         | 6a, 8, 9, 10a   |       | 5, 17 |
| 8        | 127.82                   |                                  |                 |       |       |
| 9        | 122.49                   |                                  |                 |       |       |
| 10       | 115.32                   | 7.17 (s)                         | 6b, 8, 9        |       |       |
| 10a      | 143.69                   |                                  |                 |       |       |
| 11a      | 184.23                   |                                  |                 |       |       |
| 12       | 47.10                    |                                  |                 |       |       |
| 12a      | 55.14                    | 3.05 (m)                         |                 |       | 13    |
| 13       | 28.85                    | 1.71 (m)                         | 13a             |       |       |
|          |                          | 1.86 (m)                         |                 |       |       |
| 13a      | 68.88                    |                                  |                 |       |       |
| 14       | 170.3                    |                                  |                 |       |       |
| 15       |                          | 8.55 (s)                         |                 |       |       |
| 16       | 24.50                    | 0.83 (s)                         | 6a, 12, 12a, 17 |       | 12a   |
| 17       | 21.02                    | 1.12 (s)                         | 6a, 12, 12a, 16 |       | 6,13  |

Table S15. <sup>1</sup>H-NMR, gHMBCAD, and gCOSY correlations for malbrancheamide E (**23**) isolated from MalA *in vitro* reactions. HRMS (ESI-QTOF): m/z [M+H]<sup>+</sup> calculated for C<sub>21</sub>H<sub>24</sub>BrBrN<sub>3</sub>O<sub>2</sub> = 492.0286, experimental (isolated) = 492.0293.

Malbrancheamide E CD<sub>3</sub>OD, 800MHz (600 MHz for <sup>1</sup>H-NMR)

| Position | δ <sup>13</sup> C | δ <sup>1</sup> H (J [Hz])  | gHMBCAD         | gCOSY | NOESY |
|----------|-------------------|----------------------------|-----------------|-------|-------|
| 1        | 28.37             | 1.45 (m)                   |                 | 2     | 13    |
|          |                   | 2.46 (ddd, 12.8, 9.4, 3.9) |                 |       |       |
| 2        | 23.04             | 1.89 (s)                   |                 | 1, 3  |       |
| 3        | 54.40             | 2.25 (m)                   | 13a             |       |       |
|          |                   | 3.11 (td, 8.6, 2.7)        |                 | 2     |       |
| 5        | 59.88             | 2.65 (d, 11.8)             |                 |       |       |
|          |                   | 3.71 (d, 11.4)             | 13a             |       |       |
| 5a       | 62.95             |                            |                 |       |       |
| 6        | 39.34             | 2.06 (d, 15.2)             | 6b, 11a         |       |       |
|          |                   | 2.39 (d, 15.2)             | 5               |       |       |
| 6a       | 64.010            |                            |                 |       |       |
| 6b       | 132.400           |                            |                 |       |       |
| 7        | 128.73            | 7.53 (s)                   | 6a, 8, 9, 10a   |       | 5, 17 |
| 8        | 127.82            |                            |                 |       |       |
| 9        | 122.49            |                            |                 |       |       |
| 10       | 115.32            | 7.17 (s)                   | 6b, 8, 9        |       |       |
| 10a      | 143.69            |                            |                 |       |       |
| 11a      | 184.23            |                            |                 |       |       |
| 12       | 47.10             |                            |                 |       |       |
| 12a      | 55.14             | 3.05 (m)                   |                 |       | 13    |
| 13       | 28.85             | 1.71 (m)                   | 13a             |       |       |
|          |                   | 1.86 (m)                   |                 |       |       |
| 13a      | 68.88             |                            |                 |       |       |
| 14       | 170.3             |                            |                 |       |       |
| 15       |                   | 8.55 (s)                   |                 |       |       |
| 16       | 24.50             | 0.83 (s)                   | 6a, 12, 12a, 17 |       | 12a   |
| 17       | 21.02             | 1.12 (s)                   | 6a, 12, 12a, 16 |       | 6,13  |

Table S16. <sup>1</sup>H-NMR, gHMBCAD, gCOSY, and NOESY correlations for spiromalbrancheamide E (**27**) isolated from PhqK *in vitro* reactions. HRMS (ESI-QTOF): m/z [M+H]<sup>+</sup> calculated for C<sub>21</sub>H<sub>24</sub>BrBrN<sub>3</sub>O<sub>2</sub> = 508.0235, experimental (isolated) = 508.0223.

Spiromalbrancheamide E CD<sub>3</sub>OD, 800MHz (600 MHz for <sup>1</sup>H-NMR)

| Position | δ <sup>13</sup> C | δ <sup>1</sup> H (J [Hz])  | gHMBCAD              | gCOSY | NOESY       |
|----------|-------------------|----------------------------|----------------------|-------|-------------|
| 1        | 28.37             | 1.46 (td, 11.8, 11.4, 7.2) | 13a, 14              | 2     | 2           |
|          |                   | 2.46 (ddd, 13.0, 9.4, 3.9) |                      |       |             |
| 2        | 23.04             | 1.89 (m)                   |                      |       | 1, 3        |
| 3        | 54.40             | 2.25 (q, 9.0)              | 2                    | 2     | 5           |
|          |                   | 3.11 (td, 8.9, 3.2)        | 1, 13a               |       |             |
| 5        | 59.88             | 2.65 (d, 11.6)             | 5a                   |       | 3           |
|          |                   | 3.71 (d, 11.3)             |                      |       | 6, 17       |
| 5a       | 62.94             |                            |                      |       |             |
| 6        | 39.31             | 2.06 (d, 15.2)             | 5a, 6b, 11a, 12, 12a |       |             |
|          |                   | 2.39 (d, 15.1)             | 5, 5a                |       |             |
| 6a       | 63.91             |                            |                      |       |             |
| 6b       | 133.02            |                            |                      |       |             |
| 7        | 131.82            | 7.65 (s)                   | 6a, 8, 9, 10a        |       | 6, 17       |
| 8        | 117.06            |                            |                      |       |             |
| 9        | 124.82            |                            |                      |       |             |
| 10       | 115.37            | 7.19 (s)                   | 6b, 8, 9             |       |             |
| 10a      | 144.25            |                            |                      |       |             |
| 11a      | 184.07            |                            |                      |       |             |
| 12       | 47.13             | (m)                        |                      |       |             |
| 12a      | 55.13             | 3.05                       | 5a, 12, 16, 17       | 13    | 13, 16      |
| 13       | 28.84             | 1.70 (dd, 12.8, 9.9)       | 12a, 13a, 14         | 12a   |             |
|          |                   | 1.86 (m)                   | 5a                   |       |             |
| 13a      | 68.89             |                            |                      |       |             |
| 14       | 175.86            |                            |                      |       |             |
| 15       |                   | 8.55 (s)                   |                      |       |             |
| 16       | 24.48             | 0.83 (s)                   | 6a, 12, 12a, 17      |       | 12a, 13     |
| 17       | 21.01             | 1.12 (s)                   | 6a, 12a, 16          |       | 3, 5, 7, 13 |



Table S17. Reaction data for PhqK variants, including percent conversion (conversion %), FAD cofactor incorporation (%FAD), and amount of protein obtained relative to the wild-type enzyme ([PhqK]) which is representative of the solubility/stability. Reaction conditions are mentioned above.

| Variant | Conversion %          |                       | %FAD | [PhqK] |
|---------|-----------------------|-----------------------|------|--------|
|         | Paraherquamide K (14) | Paraherquamide L (15) |      |        |
| WT      | 97                    | 83                    | 100  | 100    |
| D47A    | 3                     | 0                     | 22   | 58     |
| D47N    | 0                     | 0                     | 48   | 84     |
| Q52E    | 20                    | 23                    | 13   | 33     |
| R192A   | 11                    | 0                     | 22   | 81     |
| R192K   | 5                     | 0                     | 24   | 98     |
| F219A   | 35                    | 42                    | 11   | 49     |
| Q232A   | 3                     | 0                     | 10   | 48     |
| Q232E   | 2                     | 0                     | 10   | 40     |
| S241A   | 14                    | 20                    | 22   | 40     |
| S322A   | 9                     | 14                    | 20   | 62     |
| Q327A   | 22                    | 35                    | 11   | 31     |
| Q327E   | 12                    | 29                    | 14   | 59     |
| S397A   | 76                    | 89                    | 56   | 100    |

Table S18. Primers for *phqK* gene disruption.

|                  |           |                                                                                       |
|------------------|-----------|---------------------------------------------------------------------------------------|
| <i>phqK-Cas9</i> | Forward 1 | 5'-TCATAGCTGTTCCGCTGA-3'                                                              |
|                  | Reverse 1 | 5-CAGACAGGTCTTGCTGGAGAGACGAGCTTACTCGTTTCGTCCTCACGGACTCATCAGTCTCCACGGTGATGCTGCTCAAG-3' |
|                  | Forward 2 | 5'-TCGTCTCTCCAGCAAGACCTGTCTGGTTTTAGAGCTAGAAAATAGCAAGTAAA-3'                           |
|                  | Reverse 2 | 5'-ATTCTGCTGTCTCGGCTG-3'                                                              |

Table S19. Calculated and isolated yields from PhqK-catalyzed spirocyclization reactions

| Substrate                           | Product                                   | Isolated Yield |
|-------------------------------------|-------------------------------------------|----------------|
| Paraherquamide K (14)               | Paraherquamide M (16)                     | 91%*           |
| Paraherquamide L (15)               | Paraherquamide N (17)                     | 90%*           |
| Malbrancheamide (19)<br>2.75 mg     | Spiromalbramide (20)<br>0.94 mg           | 33%            |
| Malbrancheamide B (21)<br>3.95 mg   | Spiromalbrancheamide B (25)<br>1.68 mg    | 41%            |
| Malbrancheamide C (22)<br>1.46 mg   | Spiromalbrancheamide C (26)<br>0.27 mg    | 18%            |
| Malbrancheamide E (23)<br>1.03 mg   | Spiromalbrancheamide E (27)<br>0.89 mg    | 84%            |
| Isomalbrancheamide D (24)<br>2.2 mg | Spiroisomalbrancheamide D (28)<br>0.95 mg | 42%            |

\*Conversions determined by UV using standard curves.

Table S20. Calculated  $pK_a$  values for Arg192 in the cocrystal structures with paraherquamide K (**14**), paraherquamide L (**15**), malbrancheamide B (**21**), and malbrancheamide C (**22**) using PROPKA on the PDB2PQR server.

| <b>Substrate</b>                | <b><math>pK_a</math></b> |
|---------------------------------|--------------------------|
| Paraherquamide L ( <b>15</b> )  | 10.99                    |
| Paraherquamide K ( <b>14</b> )  | 12.26                    |
| Malbrancheamide B ( <b>21</b> ) | 12.86                    |
| Malbrancheamide C ( <b>22</b> ) | 12.93                    |
| No ligand                       | 13.04                    |
